# Supplementary material
Source: PubMed Central journal article supplement (PMC8816388)

# THE LANCET

## Supplementary appendix

This appendix formed part of the original submission and has been peer reviewed. We post it as supplied by the authors.

Supplement to: Nordström P, Ballin M, Nordström A. Risk of infection, hospitalisation, and death up to 9 months after a second dose of COVID-19 vaccine: a retrospective, total population cohort study in Sweden. *Lancet* 2022; published online Feb 4. [https://doi.org/10.1016/S0140-6736\(22\)00089-7](https://doi.org/10.1016/S0140-6736(22)00089-7).

## Supplementary Appendix to:

### Risk of infection, hospitalisation, and death up to 9 months after a second dose of COVID-19 vaccine: a retrospective, total population cohort study in Sweden

Peter Nordström, PhD, Professor, Marcel Ballin, MSc, Anna Nordström, PhD

#### Affiliations

Department of Community Medicine and Rehabilitation, Unit of Geriatric Medicine, Umeå University, Umeå, Sweden (Peter Nordström, Marcel Ballin, Anna Nordström)

Department of Public Health and Clinical Medicine, Section of Sustainable Health, Umeå University, Umeå, Sweden (Marcel Ballin, Anna Nordström)

<sup>3</sup>School of Sport Sciences, UiT the Arctic University of Norway, Tromsø, Norway (Anna Nordström)

#### Contents

|                                                                                                                                                                                                                                                                                                                                                                                                                                                                                                                                       |   |
|---------------------------------------------------------------------------------------------------------------------------------------------------------------------------------------------------------------------------------------------------------------------------------------------------------------------------------------------------------------------------------------------------------------------------------------------------------------------------------------------------------------------------------------|---|
| Supplemental Table 1. Definitions of comorbidities included. Diabetes and hypertension were defined based on prescribed medications or a diagnosis as specified below .....                                                                                                                                                                                                                                                                                                                                                           | 2 |
| Supplemental Table 2. Type of SARS-CoV-2 genotypes based on whole genome sequencing week 5-40, 2021 in Sweden. Data was derived from the Public Health Agency of Sweden ( <a href="https://www.folkhalsomyndigheten.se/smittskydd-beredskap/utbrott/aktuella-utbrott/covid-19/statistik-och-analyser/sars-cov-2-virusvarianter-av-sarskild-betydelse/">https://www.folkhalsomyndigheten.se/smittskydd-beredskap/utbrott/aktuella-utbrott/covid-19/statistik-och-analyser/sars-cov-2-virusvarianter-av-sarskild-betydelse/</a> ) ..... | 2 |
| Supplemental Table 3. Vaccine effectiveness against COVID-19 hospitalisation or death up to 9 months after full vaccination (>14 days after the second dose) by number of days after the second dose. ....                                                                                                                                                                                                                                                                                                                            | 3 |
| Supplemental Table 4. Baseline characteristics of the second matched cohort (N=3,966,630) at second dose of vaccine.....                                                                                                                                                                                                                                                                                                                                                                                                              | 3 |
| Supplemental Table 5. Vaccine effectiveness against SARS-CoV-2 infection of any severity up to 9 months after full vaccination (>14 days after the second dose) in the second matched cohort (N=3,966,630) by number of days after the second dose, according to sex, age, homemaker service, and any comorbidity at baseline.....                                                                                                                                                                                                    | 4 |
| Supplemental Table 6. Vaccine effectiveness against SARS-CoV-2 infection of any severity up to 9 months after full vaccination (>14 days after the second dose) in the second matched cohort (N=3,966,630) by number of days after the second dose for different vaccine schedules.....                                                                                                                                                                                                                                               | 5 |
| Supplemental Table 7. Vaccine effectiveness against COVID-19 hospitalisation or death up to 9 months after full vaccination (>14 days after the second dose) in the second matched cohort (N=3,966,630) by number of days after the second dose, according to sex, age, homemaker service, and any comorbidity at baseline.....                                                                                                                                                                                                       | 6 |
| Supplemental Figure 1. Vaccine effectiveness (any vaccine) against COVID-19 hospitalisation or death in 842,974 vaccinated individuals matched to equally number of unvaccinated individuals for up to 9 months of follow-up. The association was illustrated using proportional hazards models with 95% CIs (shaded areas) and restricted cubic splines. The model was adjusted for age, baseline date, sex, homemaker service, place of birth, education, and comorbidities at baseline. ....                                       | 7 |

**Supplemental Table 1. Definitions of comorbidities included. Diabetes and hypertension were defined based on prescribed medications or a diagnosis as specified below**

| Variable                              | Definition                                                               | Code Type | Codes    |
|---------------------------------------|--------------------------------------------------------------------------|-----------|----------|
| <b>Comorbidities</b>                  |                                                                          |           |          |
| Myocardial infarction                 |                                                                          | ICD-10-SE | I21      |
| Stroke                                |                                                                          | ICD-10-SE | I60-I64  |
| Hypertension                          | Hypertension                                                             | ICD-10-SE | I10      |
|                                       | Angiotensin-converting enzyme inhibitors/angiotensin II receptor blocker | ATC       | C09      |
|                                       | Calcium-receptor blocker                                                 | ATC       | C08      |
|                                       | Diuretic                                                                 | ATC       | C03      |
| Diabetes                              | Diabetes                                                                 | ICD-10-SE | E10, E11 |
|                                       | Antidiabetics                                                            | ATC       | A10      |
| Chronic obstructive pulmonary disease |                                                                          | ICD-10-SE | J40-J44  |
| Asthma                                |                                                                          | ICD-10-SE | J45, J46 |
| Cancer                                | Malignant neoplasm                                                       | ICD-10-SE | C        |
| Renal failure/chronic kidney disease  |                                                                          | ICD-10-SE | N17-N19  |
| COVID-19                              |                                                                          | ICD-10-SE | U071     |

Abbreviations: ATC, Anatomical Therapeutic Chemical; ICD-10-SE, International Classification of Diseases, 10<sup>th</sup> Revision

**Supplemental Table 2. Type of SARS-CoV-2 genotypes based on whole genome sequencing week 5-40, 2021 in Sweden. Data was derived from the Public Health Agency of Sweden (<https://www.folkhalsomyndigheten.se/smittskydd-beredskap/utbrott/aktuella-utbrott/covid-19/statistik-och-analyser/sars-cov-2-virusvarianter-av-sarskild-betydelse/>)**

| Week number, 2021 | Type of SARS-CoV-2 variant                      |                                                |                                             |                                                     | Total number of genomes sequenced‡ | Genomes sequenced of total number of cases (%) |
|-------------------|-------------------------------------------------|------------------------------------------------|---------------------------------------------|-----------------------------------------------------|------------------------------------|------------------------------------------------|
|                   | Alfa (B.1.1.7)<br>Number of cases (% of total)* | Beta (B.1.351)<br>Number of cases (% of total) | Gamma (P.1)<br>Number of cases (% of total) | Delta (B.1.617.2)<br>Number of cases (% of total) † |                                    |                                                |
| 5                 | 1121 (31.0)                                     | 90 (2.5)                                       | 6 (0.2)                                     |                                                     | 3620                               | 18                                             |
| 6                 | 2338 (45.2)                                     | 175 (3.5)                                      | 5 (0.1)                                     |                                                     | 4956                               | 23                                             |
| 7                 | 3319 (56.1)                                     | 223 (3.8)                                      | 10 (0.2)                                    |                                                     | 5921                               | 25                                             |
| 8                 | 4458 (63.5)                                     | 216 (3.1)                                      | 10 (0.1)                                    |                                                     | 7023                               | 26                                             |
| 9                 | 4716 (70.2)                                     | 157 (2.3)                                      | 6 (<0.1)                                    |                                                     | 6718                               | 24                                             |
| 10                | 6161 (76.4)                                     | 248 (3.1)                                      | 6 (<0.1)                                    |                                                     | 8061                               | 28                                             |
| 11                | 5631 (73.0)                                     | 287 (3.7)                                      | 9 (0.1)                                     |                                                     | 7713                               | 23                                             |
| 12                | 6723 (78.9)                                     | 333 (3.9)                                      | 15 (0.2)                                    |                                                     | 8522                               | 22                                             |
| 13                | 3693 (69.6)                                     | 270 (5.1)                                      | 6 (0.1)                                     | 18 (0.3)                                            | 5309                               | 14                                             |
| 14                | 3999 (76.5)                                     | 140 (2.7)                                      | 3 (<0.1)                                    | 19 (0.4)                                            | 5229                               | 13                                             |
| 15                | 3734 (76.6)                                     | 92 (1.9)                                       | 7 (0.1)                                     | 26 (0.5)                                            | 4874                               | 12                                             |
| 16                | 3509 (79.7)                                     | 115 (2.6)                                      | 4 (<0.1)                                    | 27 (0.6)                                            | 4404                               | 12                                             |
| 17                | 3516 (77.5)                                     | 68 (1.5)                                       | 0                                           | 20 (0.4)                                            | 4537                               | 13                                             |
| 18                | 4059 (89.5)                                     | 78 (1.7)                                       | 5 (0.1)                                     | 21 (0.5)                                            | 4533                               | 13                                             |
| 19                | 3276 (90.8)                                     | 64 (1.8)                                       | 13 (0.4)                                    | 29 (0.8)                                            | 3607                               | 14                                             |
| 20                | 3383 (90.1)                                     | 71 (1.9)                                       | 9 (0.2)                                     | 40 (1.1)                                            | 3753                               | 21                                             |
| 21                | 1943 (87.6)                                     | 39 (1.8)                                       | 13 (0.6)                                    | 60 (2.7)                                            | 2219                               | 28                                             |
| 22                | 1746 (76.1)                                     | 15 (0.7)                                       | 31 (1.4)                                    | 248 (10.8)                                          | 2293                               | 25                                             |
| 23                | 1509 (64.1)                                     | 8 (0.3)                                        | 14 (0.6)                                    | 576 (24.4)                                          | 2356                               | 54                                             |
| 24                | 1232 (64.2)                                     | 8 (0.4)                                        | 10 (0.5)                                    | 560 (29.1)                                          | 1919                               | 67                                             |
| 25                | 828 (57.2)                                      | 7 (0.5)                                        | 10 (0.7)                                    | 483 (33.4)                                          | 1447                               | 73                                             |
| 26                | 522 (38.1)                                      | 2 (0.2)                                        | 5 (0.4)                                     | 757 (55.3)                                          | 1370                               | 73                                             |
| 27                | 263 (22.7)                                      | 1 (<0.1)                                       | 3 (0.2)                                     | 841 (72.7)                                          | 1157                               | 76                                             |
| 28                | 102 (7.6)                                       | 0                                              | 3 (0.2)                                     | 1213 (90.1)                                         | 1341                               | 71                                             |
| 29                | 57 (3.2)                                        | 1 (<0.1)                                       | 1 (<0.1)                                    | 1692 (96.2)                                         | 1758                               | 66                                             |
| 30                | 36 (1.8)                                        | 0                                              | 0                                           | 2005 (97.4)                                         | 2058                               | 59                                             |
| 31                | 20 (0.8)                                        | 1 (<0.1)                                       | 0                                           | 2601 (98.7)                                         | 2636                               | 57                                             |
| 32                | 9 (0.3)                                         | 0                                              | 0                                           | 3372 (97.9)                                         | 3444                               | 59                                             |
| 33                | 5 (0.2)                                         | 0                                              | 1 (<0.1)                                    | 3324 (96.3)                                         | 3452                               | 53                                             |
| 34                | 4 (0.1)                                         | 0                                              | 0                                           | 3210 (97.7)                                         | 3286                               | 49                                             |
| 35                | 1 (<0.1)                                        | 0                                              | 1 (<0.1)                                    | 3089 (97.7)                                         | 3162                               | 44                                             |
| 36                | 0                                               | 0                                              | 0                                           | 2925 (87.0)                                         | 3016                               | 38                                             |
| 37                | 0                                               | 0                                              | 0                                           | 2528 (97.9)                                         | 2579                               | 41                                             |
| 38                | 0                                               | 0                                              | 0                                           | 1865 (97.4)                                         | 1915                               | 44                                             |
| 39                | 1 (<0.1)                                        | 0                                              | 0                                           | 2033 (97.5)                                         | 2085                               | 49                                             |
| 40                | 0                                               | 0                                              | 0                                           | 2112 (97.6)                                         | 2165                               | 52                                             |

\* Also includes B.1.1.7 with the mutation E484K. † Also includes subgroups to B.1.617.2 with designations beginning with AY. ‡ The total number of fully sequenced cases also includes those where sequencing has been performed but where genetic group could not be determined.

**Supplemental Table 3. Vaccine effectiveness against COVID-19 hospitalisation or death up to 9 months after full vaccination (>14 days after the second dose) by number of days after the second dose.**

|                           | Vaccinated    |                        | Unvaccinated  |                        | Vaccine effectiveness, % (95% CI)  |                 |
|---------------------------|---------------|------------------------|---------------|------------------------|------------------------------------|-----------------|
|                           | No. of events | IR/100,000 person-days | No. of events | IR/100,000 person-days | Adjusted for age and baseline date | Fully adjusted* |
| 15-30 days (N=1,685,948)  | 22            | 0.09                   | 136           | 0.56                   | 86 (78-91)                         | 89 (82-93)      |
| 31-60 days (N=1,549,267)  | 65            | 0.13                   | 354           | 0.89                   | 88 (85-91)                         | 91 (88-93)      |
| 61-120 days (N=1,341,255) | 102           | 0.12                   | 308           | 0.60                   | 87 (85-90)                         | 90 (88-92)      |
| >120 days (N=575,432)     | 88            | 0.11                   | 27            | 0.12                   | 62 (43-75)                         | 64 (44-77)      |

\*Adjusted for age, baseline date, sex, homemaker service, place of birth, education, and comorbidities according to Table 1.

**Supplemental Table 4. Baseline characteristics of the second matched cohort (N=3,966,630) at second dose of vaccine**

|                                       | Vaccinated<br>N=1,983,315 | Unvaccinated<br>N=1,983,315 |
|---------------------------------------|---------------------------|-----------------------------|
| <b>Baseline date, mean</b>            | 19 May 2021               | 19 May 2021                 |
| <b>Age, mean ± SD</b>                 | 59.4±17.2                 | 56.8±20.2                   |
| <b>Female sex, N (%)</b>              | 1,119,761 (56.5)          | 1,022,813 (51.6)            |
| <b>Homemaker service, N (%)</b>       | 167,481 (8.4)             | 97,297 (4.9)                |
| <b>Born in Sweden, N (%)</b>          | 1,682,511 (84.8)          | 1,320,344 (66.6)            |
| <b>Education, N (%)</b>               |                           |                             |
| Elementary school < 9yrs              | 171,954 (8.7)             | 228,702 (11.5)              |
| Elementary school 9yrs                | 184,453 (9.3)             | 249,703 (12.6)              |
| Secondary school, 2 yrs               | 507,517 (25.6)            | 490,785 (24.7)              |
| Secondary school, >2 yrs              | 341,513 (17.2)            | 311,037 (15.7)              |
| University education                  | 743,795 (37.5)            | 517,708 (26.1)              |
| Unknown                               | 34,083 (1.7)              | 186,010 (9.4)               |
| <b>Diagnoses at baseline, N (%)</b>   |                           |                             |
| Myocardial infarction                 | 65,950 (3.3)              | 57,839 (2.9)                |
| Stroke                                | 68,991 (3.5)              | 52,203 (2.6)                |
| Diabetes                              | 231,561 (11.7)            | 184,588 (9.3)               |
| Hypertension                          | 770,155 (38.8)            | 592,423 (29.9)              |
| Kidney failure                        | 44,177 (2.2)              | 30,497 (1.5)                |
| Chronic obstructive pulmonary disease | 44,187 (2.2)              | 41,708 (2.1)                |
| Asthma                                | 101,710 (5.1)             | 89,472 (4.5)                |
| Cancer                                | 137,929 (7.0)             | 101,158 (5.1)               |
| SARS-CoV-2 infection                  | 0                         | 0                           |

**Supplemental Table 5. Vaccine effectiveness against SARS-CoV-2 infection of any severity up to 9 months after full vaccination (>14 days after the second dose) in the second matched cohort (N=3,966,630) by number of days after the second dose, according to sex, age, homemaker service, and any comorbidity at baseline**

|                                         | Vaccinated    |                                   | Unvaccinated  |                                   | Vaccine effectiveness, % (95% CI)  |                 |
|-----------------------------------------|---------------|-----------------------------------|---------------|-----------------------------------|------------------------------------|-----------------|
|                                         | No. of events | Incidence rate/100000 person-days | No. of events | Incidence rate/100000 person-days | Adjusted for age and baseline date | Fully adjusted* |
| <b>Total study cohort (any vaccine)</b> |               |                                   |               |                                   |                                    |                 |
| <b>15-30 days (N=3,966,630)</b>         |               |                                   |               |                                   |                                    |                 |
| Men (N=1,824,056)                       | 235           | 0.9                               | 3,502         | 12.6                              | 89 (88-91)                         | 90 (89-91)      |
| Women (N=2,142,574)                     | 420           | 1.3                               | 3,411         | 11.6                              | 90 (88-91)                         | 90 (89-91)      |
| <50 years (N=1,129,195)                 | 255           | 1.5                               | 4,600         | 28.2                              | 94 (93-95)                         | 94 (93-95)      |
| 50-64 years (N=1,306,783)               | 186           | 1.0                               | 1,370         | 7.1                               | 87 (85-89)                         | 87 (85-89)      |
| 65-79 years (N=1,072,599)               | 83            | 0.5                               | 499           | 3.3                               | 84 (79-87)                         | 85 (81-88)      |
| ≥80 years (N=458,053)                   | 131           | 1.9                               | 444           | 7.2                               | 77 (72-81)                         | 78 (74-82)      |
| Any comorbidity (N=1,700,258)           | 326           | 1.1                               | 1,692         | 7.9                               | 85 (83-86)                         | 86 (84-87)      |
| Homemaker service (N=264,778)           | 136           | 2.7                               | 207           | 7.5                               | 78 (72-83)                         | 77 (71-82)      |
| <b>31-60 days (N=3,667,937)</b>         |               |                                   |               |                                   |                                    |                 |
| Men (N=1,683,085)                       | 681           | 1.3                               | 6,400         | 13.6                              | 85 (84-86)                         | 86 (85-87)      |
| Women (N=1,984,852)                     | 1,383         | 2.1                               | 6,589         | 13.3                              | 85 (84-86)                         | 86 (85-86)      |
| <50 years (N=1,044,921)                 | 913           | 2.7                               | 8,780         | 31.9                              | 90 (90-91)                         | 90 (90-91)      |
| 50-64 years (N=1,237,496)               | 646           | 1.7                               | 3,165         | 9.2                               | 83 (81-84)                         | 82 (80-83)      |
| 65-79 years (N=997,293)                 | 254           | 0.8                               | 663           | 2.5                               | 71 (66-75)                         | 73 (68-77)      |
| ≥80 years (N=388,227)                   | 251           | 1.8                               | 381           | 4.5                               | 72 (68-76)                         | 75 (70-79)      |
| Any comorbidity (N=1,561,378)           | 835           | 1.5                               | 2,813         | 8.1                               | 81 (80-83)                         | 82 (80-83)      |
| Homemaker service (N=244,561)           | 284           | 2.9                               | 208           | 4.7                               | 74 (67-79)                         | 72 (65-78)      |
| <b>61-120 days (N=3,353,855)</b>        |               |                                   |               |                                   |                                    |                 |
| Men (N=1,533,402)                       | 1,417         | 1.5                               | 6,259         | 9.0                               | 79 (78-80)                         | 79 (78-80)      |
| Women (N=1,820,453)                     | 2,672         | 2.2                               | 6,639         | 9.1                               | 79 (78-80)                         | 79 (78-80)      |
| <50 years (N=936,779)                   | 1,939         | 3.4                               | 8,100         | 21.8                              | 83 (82-84)                         | 83 (82-83)      |
| 50-64 years (N=1,163,704)               | 1,226         | 1.8                               | 3,606         | 6.9                               | 78 (76-79)                         | 76 (74-78)      |
| 65-79 years (N=919,304)                 | 541           | 0.9                               | 1,011         | 2.5                               | 69 (65-72)                         | 63 (59-67)      |
| ≥80 years (N=334,068)                   | 383           | 1.4                               | 181           | 1.6                               | 55 (47-62)                         | 55 (45-63)      |
| Any comorbidity (N=1,429,758)           | 1,685         | 1.6                               | 2,911         | 5.7                               | 76 (74-77)                         | 74 (72-75)      |
| Homemaker service (N=228,320)           | 437           | 2.3                               | 194           | 2.7                               | 57 (47-64)                         | 52 (41-61)      |
| <b>121-180 days (N=1,438,433)</b>       |               |                                   |               |                                   |                                    |                 |
| Men (N=582,945)                         | 420           | 0.7                               | 363           | 1.2                               | 45 (36-52)                         | 49 (40-56)      |
| Women (N=855,488)                       | 771           | 0.8                               | 461           | 1.3                               | 52 (46-58)                         | 48 (40-54)      |
| <50 years (N=320,382)                   | 536           | 1.6                               | 367           | 2.5                               | 50 (43-57)                         | 49 (41-56)      |
| 50-64 years (N=280,596)                 | 243           | 0.8                               | 91            | 0.8                               | 44 (28-57)                         | 33 (10-50)      |
| 65-79 years (N=533,415)                 | 212           | 0.4                               | 145           | 0.6                               | 52 (39-61)                         | 43 (27-56)      |
| ≥80 years (N=304,040)                   | 200           | 0.5                               | 221           | 1.6                               | 65 (57-71)                         | 60 (50-67)      |
| Any comorbidity (N=755,262)             | 524           | 0.6                               | 345           | 1.2                               | 60 (54-66)                         | 56 (48-62)      |
| Homemaker service (N=194,230)           | 145           | 0.5                               | 125           | 1.9                               | 69 (58-77)                         | 64 (51-73)      |
| <b>&gt;180 days (N=504,501)</b>         |               |                                   |               |                                   |                                    |                 |
| Men (N=170,689)                         | 442           | 1.5                               | 145           | 2.2                               | 28 (13-41)                         | 26 (8-40)       |
| Women (N=333,812)                       | 1,104         | 1.7                               | 189           | 2.2                               | 37 (26-46)                         | 30 (17-41)      |
| <80 years (N=319,194)                   | 1,109         | 1.8                               | 261           | 3.0                               | 27 (16-37)                         | 26 (14-37)      |
| ≥80 years (N=185,307)                   | 437           | 1.3                               | 73            | 1.1                               | 42 (28-54)                         | 35 (17-50)      |
| Any comorbidity (N=292,863)             | 759           | 1.3                               | 105           | 1.6                               | 44 (32-54)                         | 33 (17-46)      |
| Homemaker service (N=146,546)           | 485           | 1.6                               | 36            | 1.5                               | 45 (23-61)                         | 39 (15-56)      |

\*Adjusted for age, baseline date, sex, homemaker service, place of birth, education, and comorbidities at baseline.

**Supplemental Table 6. Vaccine effectiveness against SARS-CoV-2 infection of any severity up to 9 months after full vaccination (>14 days after the second dose) in the second matched cohort (N=3,966,630) by number of days after the second dose for different vaccine schedules.**

|                                                                    | Vaccinated    |                        | Unvaccinated  |                        | Vaccine effectiveness, % (95% CI)  |                 |
|--------------------------------------------------------------------|---------------|------------------------|---------------|------------------------|------------------------------------|-----------------|
|                                                                    | No. of events | IR/100,000 person-days | No. of events | IR/100,000 person-days | Adjusted for age and baseline date | Fully adjusted* |
| <b>Total study cohort (any vaccine) (N=3,966,630)</b>              | 9,545         | 3.5                    | 33,958        | 19.3                   | 80 (80-81)                         | 81 (81-81)      |
| 15-30 days (N=3,966,630)                                           | 655           | 1.1                    | 6,913         | 12.1                   | 80 (79-80)                         | 80 (80-81)      |
| 31-60 days (N=3,667,937)                                           | 2,064         | 1.7                    | 12,989        | 13.4                   | 85 (85-86)                         | 86 (85-87)      |
| 61-120 days (N=3,353,855)                                          | 4,089         | 1.9                    | 12,898        | 9.0                    | 79 (78-80)                         | 79 (78-80)      |
| 121-180 days (N=1,438,433)                                         | 1,191         | 0.76                   | 824           | 1.3                    | 50 (45-54)                         | 48 (43-53)      |
| 181-210 days (N=504,501)                                           | 877           | 1.0                    | 255           | 1.8                    | 41 (32-49)                         | 36 (25-45)      |
| >210 days (N=317,272)                                              | 669           | 1.0                    | 79            | 1.0                    | 5 (-20-25)                         | 1 (-26-22)      |
| <b>BNT162b2 subcohort (N=2,978,586)</b>                            | 7,786         | 3.7                    | 29,192        | 22.1                   | 81 (81-82)                         | 82 (81-82)      |
| 15-30 days (N=2,978,586)                                           | 540           | 1.2                    | 5,893         | 13.7                   | 90 (89-91)                         | 91 (90-91)      |
| 31-60 days (N=2,748,173)                                           | 1,766         | 2.0                    | 11,412        | 15.8                   | 86 (85-86)                         | 86 (86-87)      |
| 61-120 days (N=2,507,054)                                          | 3,073         | 1.9                    | 10,932        | 10.3                   | 81 (80-82)                         | 81 (80-82)      |
| 121-180 days (N=1,100,197)                                         | 904           | 0.74                   | 641           | 1.3                    | 53 (48-58)                         | 52 (46-57)      |
| 181-210 days (N=463,310)                                           | 839           | 1.0                    | 235           | 1.8                    | 39 (29-48)                         | 34 (23-44)      |
| >210 days (N=305,797)                                              | 664           | 1.0                    | 79            | 1.0                    | 5 (-20-25)                         | 3 (-24-24)      |
| <b>mRNA-1273 subcohort (N=370,358)</b>                             | 526           | 2.2                    | 2,851         | 17.7                   | 86 (85-87)                         | 87 (86-88)      |
| 15-30 days (N=370,358)                                             | 41            | 0.74                   | 765           | 14.4                   | 94 (92-96)                         | 94 (92-96)      |
| 31-60 days (N=339,240)                                             | 125           | 1.1                    | 1,158         | 13.1                   | 90 (88-92)                         | 91 (89-92)      |
| 61-120 days (N=311,639)                                            | 210           | 1.1                    | 802           | 6.2                    | 82 (79-85)                         | 83 (80-85)      |
| 121-180 days (N=134,587)                                           | 108           | 0.75                   | 106           | 1.6                    | 64 (53-72)                         | 62 (49-72)      |
| >180 days (N=40,223)                                               | 42            | 0.61                   | 20            | 1.4                    | 63 (35-79)                         | 46 (1-71)       |
| <b>ChAdOx1 nCoV-19 subcohort (N=445,076)</b>                       | 773           | 3.0                    | 1,180         | 5.7                    | 51 (46-55)                         | 46 (41-51)      |
| 15-30 days (N=445,076)                                             | 52            | 0.78                   | 142           | 2.2                    | 62 (48-72)                         | 63 (48-74)      |
| 31-60 days (N=424,544)                                             | 113           | 0.85                   | 280           | 2.4                    | 63 (54-70)                         | 57 (46-66)      |
| 61-120 days (N=398,819)                                            | 491           | 2.0                    | 714           | 3.9                    | 51 (45-57)                         | 45 (37-51)      |
| >120 days (N=116,128)                                              | 117           | 1.1                    | 44            | 0.82                   | -24 (-76-12)                       | -33 (-101-12)   |
| <b>ChAdOx1 nCoV-19 and an mRNA vaccine † subcohort (N=166,972)</b> | 443           | 4.2                    | 697           | 10.2                   | 62 (57-67)                         | 63 (58-68)      |
| 15-30 days (N=166,972)                                             | 20            | 0.80                   | 105           | 4.4                    | 80 (68-88)                         | 79 (66-87)      |
| 31-60 days (N=150,907)                                             | 55            | 1.1                    | 117           | 3.1                    | 64 (49-74)                         | 67 (52-77)      |
| 61-120 days (N=76,924)                                             | 309           | 3.2                    | 444           | 8.4                    | 63 (57-68)                         | 62 (55-68)      |
| >120 days (N=85,508)                                               | 59            | 0.74                   | 31            | 0.89                   | 16 (-30-46)                        | 20 (-26-50)     |

\*Adjusted for age, baseline date, sex, homemaker service, place of birth, education, and comorbidities at baseline. † The mRNA vaccine was either BNT162b2 or mRNA-1273

**Supplemental Table 7. Vaccine effectiveness against COVID-19 hospitalisation or death up to 9 months after full vaccination (>14 days after the second dose) in the second matched cohort (N=3,966,630) by number of days after the second dose, according to sex, age, homemaker service, and any comorbidity at baseline**

|                                       | Vaccinated    |                        | Unvaccinated  |                        | Vaccine effectiveness, % (95% CI)  |                 |
|---------------------------------------|---------------|------------------------|---------------|------------------------|------------------------------------|-----------------|
|                                       | No. of events | IR/100,000 person-days | No. of events | IR/100,000 person-days | Adjusted for age and baseline date | Fully adjusted* |
| <b>Total (2 doses of any vaccine)</b> |               |                        |               |                        |                                    |                 |
| <b>15-30 days (N=3,966,630)</b>       | 42            | 0·07                   | 398           | 0·70                   | 91 (88-94)                         | 92 (89-94)      |
| Men (N=1,824,056)                     | 25            | 0·10                   | 199           | 0·70                   | 88 (81-92)                         | 90 (84-93)      |
| Women (N=2,142,574)                   | 17            | 0·05                   | 199           | 0·70                   | 93 (89-96)                         | 94 (90-96)      |
| <80 years (N=3,508,577)               | 22            | 0·04                   | 213           | 0·42                   | 91 (85-94)                         | 92 (87-95)      |
| ≥80 years (N=458,053)                 | 20            | 0·28                   | 185           | 3·00                   | 92 (87-95)                         | 92 (88-95)      |
| Any comorbidity (N=1,700,258)         | 41            | 0·14                   | 281           | 1·31                   | 89 (85-92)                         | 91 (87-93)      |
| Homemaker service (N=264,778)         | 23            | 0·46                   | 101           | 3·64                   | 92 (88-95)                         | 92 (87-95)      |
| <b>31-60 days (N=3,675,040)</b>       | 128           | 0·11                   | 750           | 0·77                   | 90 (87-91)                         | 90 (88-92)      |
| Men (N=1,686,584)                     | 66            | 0·13                   | 368           | 0·78                   | 86 (82-90)                         | 88 (84-91)      |
| Women (N=1,988,456)                   | 62            | 0·09                   | 382           | 0·77                   | 91 (89-93)                         | 91 (88-93)      |
| <80 years (N=3,286,444)               | 53            | 0·05                   | 487           | 0·55                   | 92 (89-94)                         | 92 (89-94)      |
| ≥80 years (N=388,596)                 | 75            | 0·54                   | 263           | 3·13                   | 88 (84-91)                         | 88 (84-91)      |
| Any comorbidity (N=1,563,063)         | 123           | 0·22                   | 478           | 1·37                   | 87 (85-90)                         | 87 (85-90)      |
| Homemaker service (N=244,779)         | 76            | 0·76                   | 120           | 2·69                   | 89 (85-92)                         | 89 (84-92)      |
| <b>61-120 days (N=3,282,190)</b>      | 168           | 0·08                   | 674           | 0·49                   | 89 (87-91)                         | 89 (86-90)      |
| Men (N=1,499,366)                     | 98            | 0·11                   | 357           | 0·53                   | 86 (83-89)                         | 88 (84-90)      |
| Women (N=1,782,824)                   | 70            | 0·06                   | 317           | 0·45                   | 91 (89-93)                         | 89 (86-92)      |
| <80 years (N=2,947,640)               | 73            | 0·04                   | 562           | 0·45                   | 93 (91-95)                         | 92 (90-94)      |
| ≥80 years (N=334,550)                 | 95            | 0·35                   | 112           | 0·96                   | 83 (78-87)                         | 84 (79-88)      |
| Any comorbidity (N=1,421,723)         | 157           | 0·15                   | 424           | 0·85                   | 88 (86-90)                         | 86 (83-88)      |
| Homemaker service (N=228,434)         | 112           | 0·58                   | 82            | 1·15                   | 82 (75-88)                         | 81 (72-87)      |
| <b>&gt;120 days (N=1,194,976)</b>     | 141           | 0·09                   | 118           | 0·21                   | 80 (74-84)                         | 78 (72-83)      |
| Men (N=468,292)                       | 72            | 0·14                   | 42            | 0·17                   | 69 (56-78)                         | 68 (52-79)      |
| Women (N=726,684)                     | 69            | 0·07                   | 76            | 0·25                   | 85 (79-89)                         | 83 (76-88)      |
| <80 years (N=893,317)                 | 46            | 0·04                   | 39            | 0·09                   | 86 (78-90)                         | 86 (77-91)      |
| ≥80 years (N=301,659)                 | 95            | 0·22                   | 79            | 0·57                   | 76 (68-82)                         | 72 (63-80)      |
| Any comorbidity (N=642,329)           | 123           | 0·14                   | 91            | 0·38                   | 82 (76-86)                         | 79 (72-84)      |
| Homemaker service (N=189,080)         | 99            | 0·31                   | 47            | 0·78                   | 77 (65-84)                         | 71 (58-80)      |

\*Adjusted for age, baseline date, sex, homemaker service, place of birth, education, and comorbidities at baseline.

**Supplemental Figure 1. Vaccine effectiveness (any vaccine) against COVID-19 hospitalisation or death in 842,974 vaccinated individuals matched to equally number of unvaccinated individuals for up to 9 months of follow-up. The association was illustrated using proportional hazards models with 95% CIs (shaded areas) and restricted cubic splines. The model was adjusted for age, baseline date, sex, homemaker service, place of birth, education, and comorbidities at baseline.**

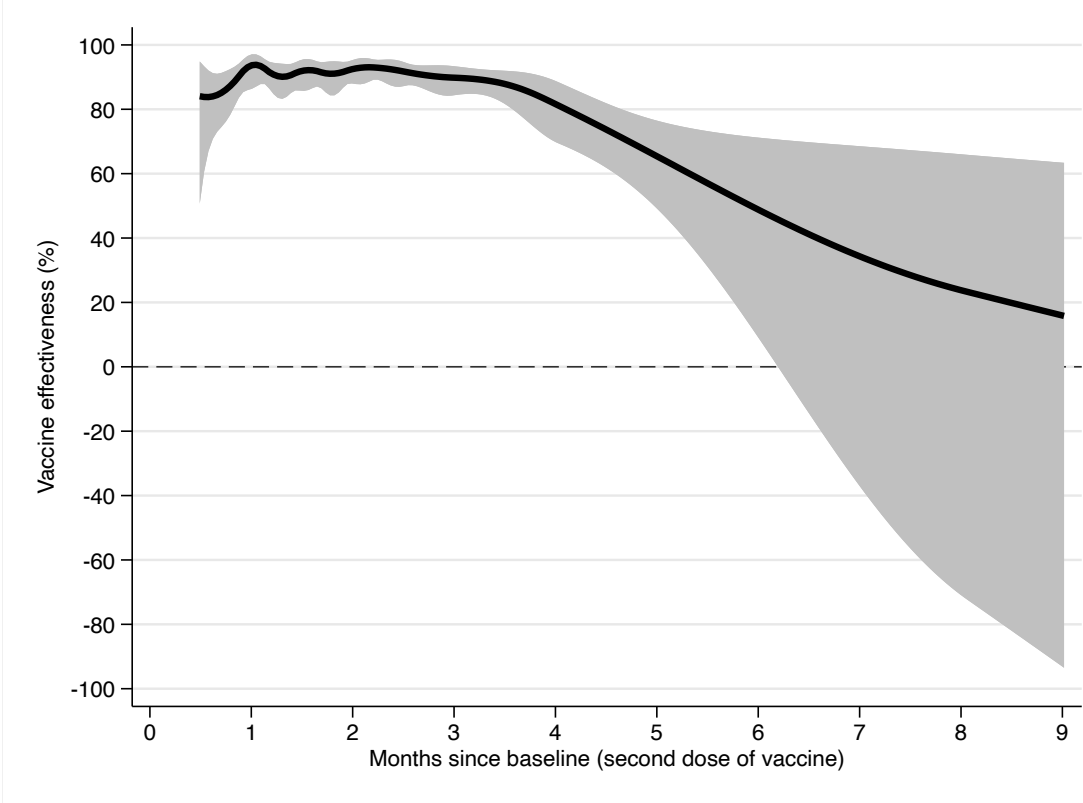

Supplement: mmc1.pdf [file mmc1.pdf]
